# Supplementary material
Source: PubMed Central journal article supplement (PMC7726698)
Supplement: jamasurg-e205666-s003.pdf [file jamasurg-e205666-s003.pdf]

## Data Sharing Statement

Grönroos. Effect of Laparoscopic Sleeve Gastrectomy vs Roux-en-Y Gastric Bypass on Weight Loss and Quality of Life at 7 Years in Patients With Morbid Obesity. *JAMA Surg*. Published December 09, 2020. doi:10.1001/jamasurg.2020.5666

### Data

**Data available:** No

### Additional Information

**Explanation for why data not available:** The data will be made available by request from the corresponding author.
